# Supplementary material for: Cell In Vitro Testing with Soil Invertebrates—Challenges and Opportunities toward Modeling the Effect of Nanomaterials: A Surface-Modified CuO Case Study
Source: MDPI journal article supplement (doi:10.3390/nano9081087), 2019-07-29
Supplement: s1 [file s1]

# Cell *In Vitro* Testing with Soil Invertebrates – Challenges and Opportunities toward Modeling the Effect of Nanomaterials: A Surface-Modified CuO Case Study

Maria J. Ribeiro <sup>1</sup>, Mónica J.B. Amorim <sup>1,\*</sup> and Janeck J. Scott-Fordsmand <sup>2</sup>

<sup>1</sup> Department of Biology & CESAM, University of Aveiro, 3810-193 Aveiro, Portugal

<sup>2</sup> Department of Bioscience, Aarhus University, Vejlsovej 25, P.O. BOX 314, DK-8600 Silkeborg, Denmark

\* Correspondence: mjamorim@ua.pt; Tel.: +351-234-247-093

Received: 9 July 2019; Accepted: 18 July 2019; Published: date

**Table S1:** Physical-chemical characteristics of the pristine CuO NMs.

| Characteristics                                                                 | Pristine CuO NMs                             |
|---------------------------------------------------------------------------------|----------------------------------------------|
| Manufacturer                                                                    | Plasma chem                                  |
| CAS number                                                                      | 1317-38-0                                    |
| Primary size distribution (average)                                             | 3 – 35 (12)                                  |
| Mode (1st quartile – 3rd quartile) [nm]                                         | 10 (9.2 – 14)                                |
| Shape                                                                           | Semi-spherical                               |
| Average crystallite size [nm]                                                   | 9.3                                          |
| Crystallite phases (%)                                                          | Tenorite 100 %                               |
| Dispersibility in water: D50 [nm];<br>Average Agglomeration Number (AAN)        | 135.5 ± 4.6<br>346                           |
| Dispersibility in modified MEM: D50 [nm];<br>Average Agglomeration Number (AAN) | 85.2 ± 2.7<br>77                             |
| Z-potential in UP water [mV]                                                    | +28.1 ± 0.6                                  |
| IsoElectric Point (pH)                                                          | 10.3                                         |
| Photocatalysis: photon efficiency                                               | 1.5x10 <sup>-4</sup>                         |
| Specific Surface Area [m <sup>2</sup> g/1]                                      | 47.0 ± 1.7                                   |
| Pore sizes [nm]                                                                 | 13.5 ± 1.6 (BJH)<br>23.0 ± 0.9 (AVG)         |
| Surface chemistry [atomic fraction]                                             | Cu = 0.46±0.05; O = 0.47±0.05; C = 0.07±0.01 |
| Chemical impurities [mg kg/1]                                                   | Na: 505 ± 30; Pb: 36 ± 2; Ag: 13 ± 4         |
|                                                                                 |                                              |
